# Supplementary material
Source: publisher figshare collection journal article supplement (https://tandf.figshare.com/articles/dataset/_/7108760)
Supplement: Supplementary file 1 [file 1]

| **Basalt 82262 to evolved basalt 82263** | | | | | | | | | | |  | |  | |  | |
| --- | --- | --- | --- | --- | --- | --- | --- | --- | --- | --- | --- | --- | --- | --- | --- | --- |
| ***Comps.*** | ***Init. mag.*** | | ***Final mag.*** | |  | | ***Phase analyses (normalized to 100%)*** | | | | | | | |  | |
|  | 82262 | | 82263 | |  | | Ol | | cpx | | Plag | | Ti-Mt | |  | |
| SiO2 | 46.80 | | 47.56 | |  | | 37.12 | | 48.57 | | 55.76 | | 0.10 | |  | |
| TiO2 | 3.18 | | 3.45 | |  | | 0.00 | | 1.97 | | 0.00 | | 25.83 | |  | |
| Al2O3 | 14.89 | | 14.86 | |  | | 0.00 | | 5.93 | | 27.66 | | 1.57 | |  | |
| FeOt | 12.75 | | 13.25 | |  | | 29.29 | | 8.83 | | 0.51 | | 69.61 | |  | |
| MgO | 8.11 | | 6.98 | |  | | 32.63 | | 13.76 | | 0.00 | | 2.90 | |  | |
| CaO | 9.80 | | 8.86 | |  | | 0.19 | | 20.26 | | 10.59 | | 0.00 | |  | |
| Na2O | 2.80 | | 3.14 | |  | | 0.00 | | 0.67 | | 5.48 | | 0.00 | |  | |
| K2O | 1.06 | | 1.12 | |  | | 0.00 | | 0.00 | | 0.00 | | 0.00 | |  | |
| P2O5 | 0.60 | | 0.77 | |  | | 0.00 | | 0.00 | | 0.00 | | 0.00 | |  | |
| Total | 99.99 | | 99.99 | |  | | 99.23 | | 99.99 | | 100.00 | | 100.01 | |  | |
|  |  | | ***∑(R^2)*** | |  | | ***Phase percents (relative to initial magma)*** | | | | | | | | | |
|  |  | | 0.412 | |  | | -6.38 | | -13.03 | | -19.40 | | -3.19 | |  | |
| **Basalt 82277 to Hawaiite 82276** | | | | | | | | | | | |  | |  | |  | |
| ***Comps.*** | | ***Init. mag.*** | | ***Final mag.*** | |  | | ***Phase analyses (normalized to 100%)*** | | | | | | | |  | |
|  | | 82277 | | 82276 | |  | | Ol | | cpx | | Plag | | Ti-Mt | |  | |
| SiO2 | | 46.58 | | 54.41 | |  | | 37.40 | | 48.57 | | 55.78 | | 0.00 | |  | |
| TiO2 | | 3.37 | | 2.24 | |  | | 0.00 | | 1.97 | | 0.00 | | 25.41 | |  | |
| Al2O3 | | 14.23 | | 16.96 | |  | | 0.00 | | 5.93 | | 27.67 | | 1.77 | |  | |
| FeOt | | 13.25 | | 9.70 | |  | | 29.52 | | 8.83 | | 0.51 | | 70.22 | |  | |
| MgO | | 7.16 | | 2.89 | |  | | 32.88 | | 13.76 | | 0.00 | | 2.59 | |  | |
| CaO | | 11.40 | | 6.66 | |  | | 0.19 | | 20.26 | | 10.56 | | 0.00 | |  | |
| Na2O | | 2.58 | | 3.70 | |  | | 0.00 | | 0.67 | | 5.48 | | 0.00 | |  | |
| K2O | | 0.94 | | 2.62 | |  | | 0.00 | | 0.00 | | 0.00 | | 0.00 | |  | |
| P2O5 | | 0.48 | | 0.81 | |  | | 0.00 | | 0.00 | | 0.00 | | 0.00 | |  | |
| Total | | 99.99 | | 99.99 | |  | | 99.99 | | 99.99 | | 100.00 | | 99.99 | |  | |
|  | |  | | ***∑(R^2)*** | |  | | ***Phase percents (relative to initial magma)*** | | | | | | | | | |
|  | |  | | 0.359 | |  | | -5.29 | | -33.36 | | -30.59 | | -9.48 | |  | |
